# Supplementary material
Source: MDPI journal article supplement (https://www.mdpi.com/2073-4433/14/5/809)
Supplement: s1 [file s1]

## Supplementary Materials:

# The Chemical Characteristics of Rainwater and Wet Atmospheric Deposition Fluxes at Two Urban Sites and One Rural Site in Côte d'Ivoire

Mohamed L. Kassamba-Diaby <sup>1</sup>, Corinne Galy-Lacaux <sup>2</sup>, Véronique Yoboué <sup>1</sup>, Jonathan E. Hickman <sup>3,4</sup>, Camille Mouchel-Vallon <sup>2</sup>, Kerneels Jaars <sup>5</sup>, Sylvain Gnamien <sup>1</sup>, Richmond Konan <sup>1</sup>, Eric Gardrat <sup>2</sup> and Siele Silué <sup>6</sup>

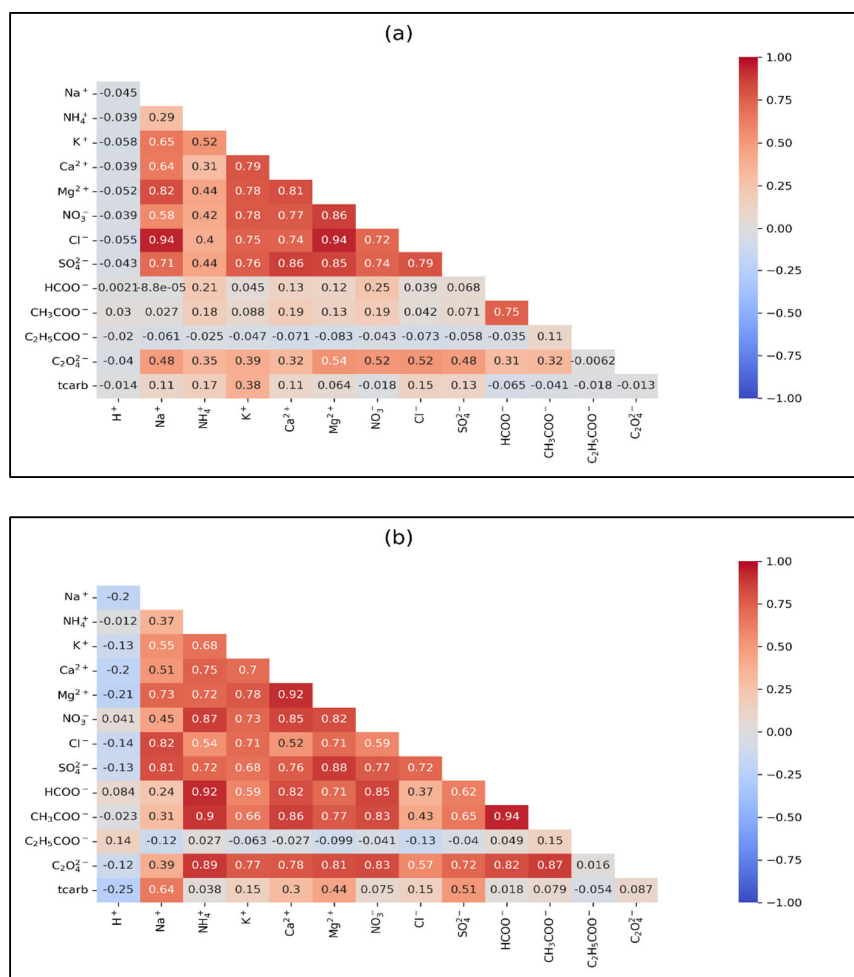

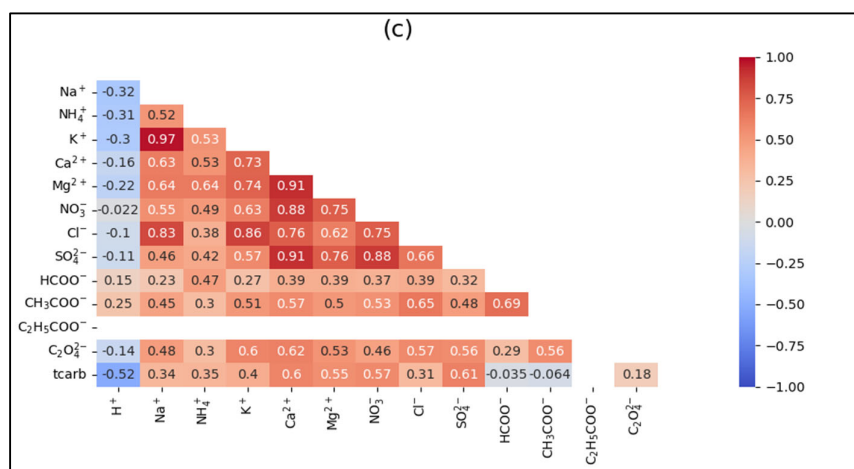

**Figure S1.** Spearman matrix correlation of rainwater Volume Weighted Mean (VWM) concentrations ( $\mu\text{eq L}^{-1}$ ) for Abidjan(a), Lamto (b) and Korhogo(c)

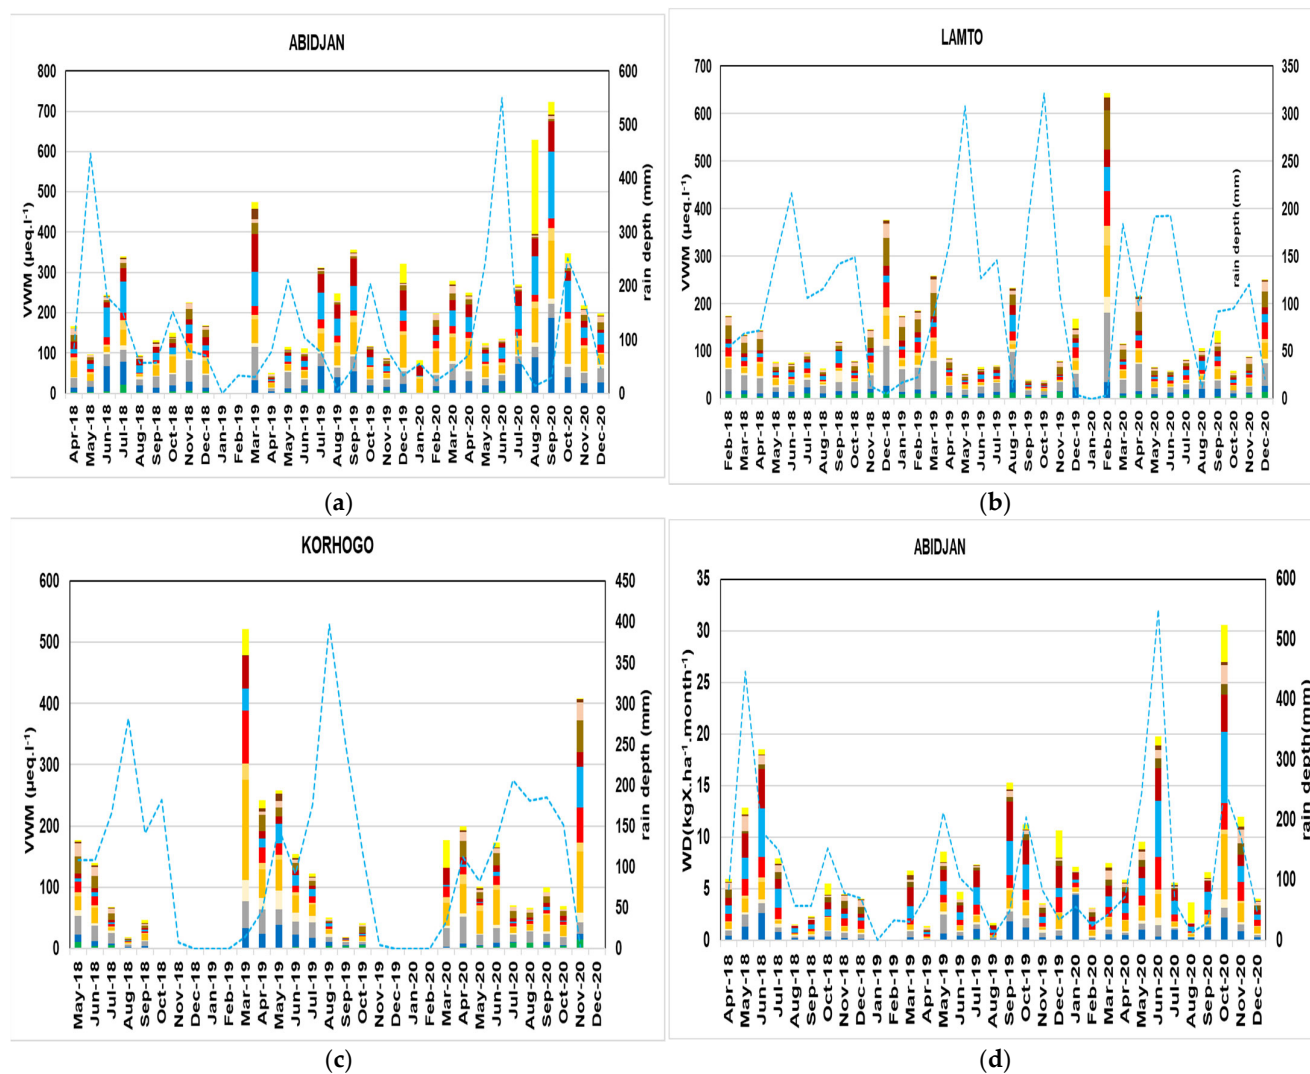

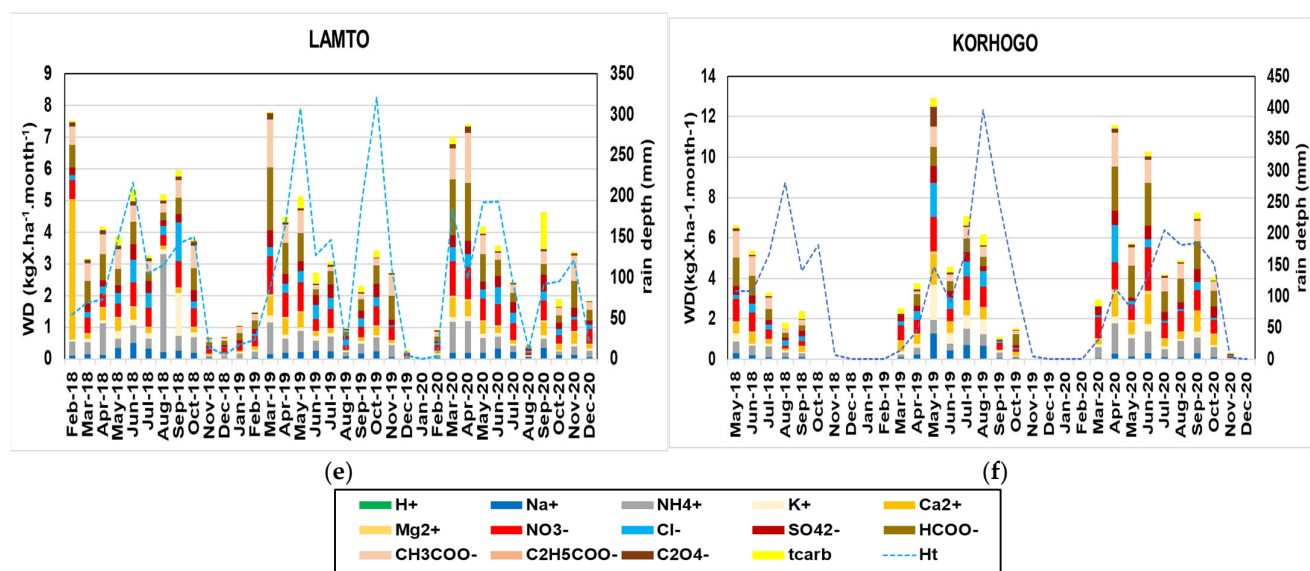

Notes: \* X corresponds to the different ionic species in rains analyzed by ionic chromatography

\* tcarb = total carbonates species calculated from this equation  $\text{tcarb} = 10^{(\text{pH}-5.505)}$  [1].

**Figure S2.** Monthly Volume Weighted Mean (VWM) concentrations of major ions ( $\mu\text{eq L}^{-1}$ ) at Abidjan (a), Lamto (b) and Korhogo (c) and monthly Wet Deposition (WD) fluxes ( $\text{kgX ha}^{-1} \text{yr}^{-1}$ ) at Abidjan (d), Lamto (e) and Korhogo (f).

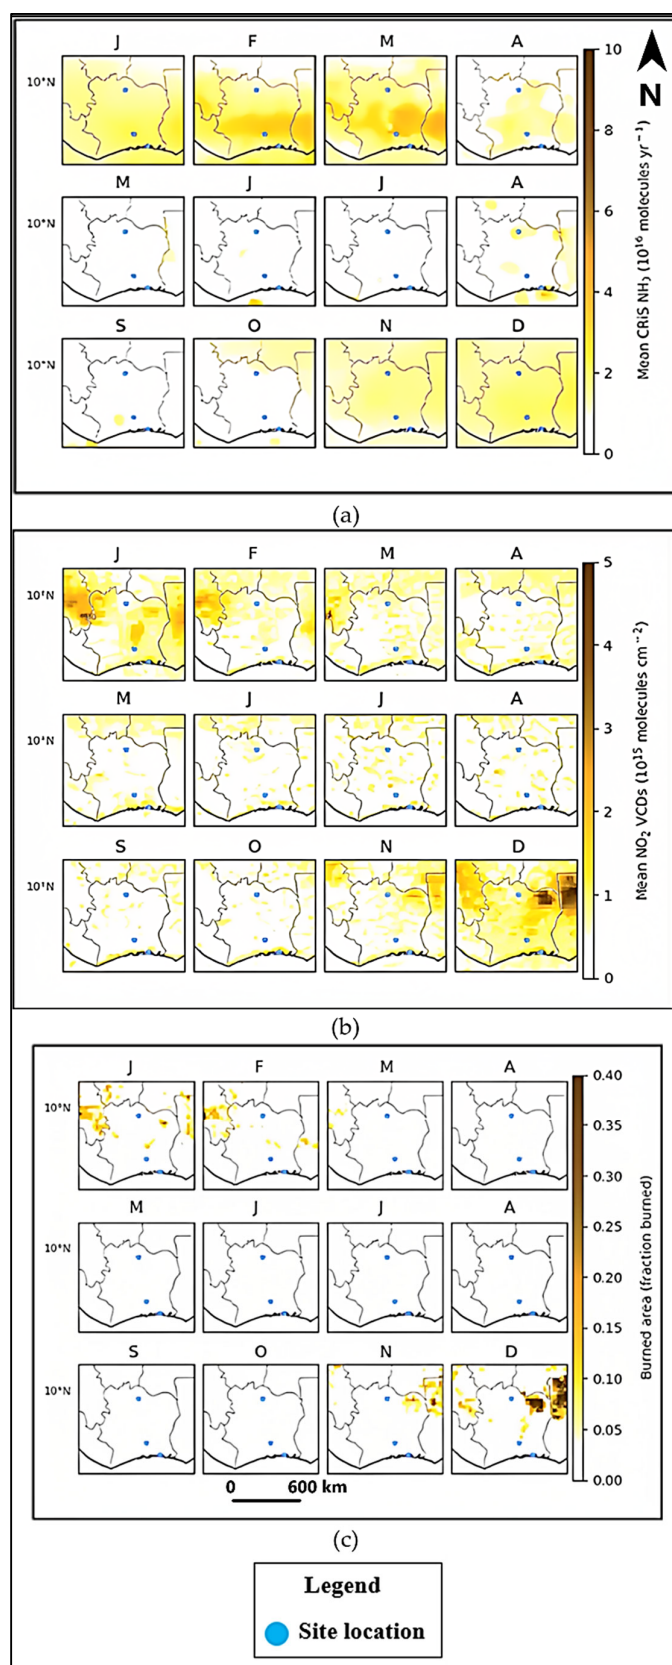

**Figure S3.** Monthly mean Vertical Column Densities (VCD) of  $\text{NH}_3$  from CRiS (upper panel), tropospheric VCD of  $\text{NO}_2$  from OMI (middle panel), and burned area from MODIS (lower panel) averaged over 2018-2020. Note that the means for  $\text{NH}_3$  do not include April–July 2019

#### S4. Calculations and Statistics

Annual and monthly Volume Weighed Mean (VWM) concentrations in  $\mu\text{eq L}^{-1}$  for each ion are calculated using methods described by [2,3]:

$$\text{VWM} = \sum_{i=1}^N C_i \cdot P_i / \sum_{i=1}^N P_i \quad (\text{S1})$$

Where  $C_i$  in  $\mu\text{eq L}^{-1}$  is the concentration of a given chemical element for each rain event,  $P_i$  is rainfall depth for each rain event in mm.  $N$  is the number of rain events.

The annual and monthly Wet Deposition fluxes (WD) for all ionic species are expressed in  $\text{kg ha}^{-1} \text{yr}^{-1}$  are calculated using the following equation [4]:

$$\text{WD} = (\text{VWM} / c_i) \times M_i \times P_t / 100,000 \quad (\text{S2})$$

Where VWM is the volume weighted mean concentration in  $\mu\text{eq L}^{-1}$ ,  $c_i$  is the ionic charge,  $M_i$  in  $\text{g mol}^{-1}$  is the molar mass of each species and  $P_t$  in mm is the annual or monthly rain depth.

The  $\text{H}^+$  concentrations are calculated from measured pH values using the equation:

$$[\text{H}^+] = 10^{-\text{pH}} \quad (\text{S3})$$

Sea Salt Fraction (SSF) and Non Sea Salt Fraction (NSSF) to ionic concentrations in rainwater and corresponding enrichment factors (EF) are calculated according to the method suggested by many authors [5,6].

$$\text{EF}_{\text{marine}} = [\text{X}/\text{Na}^+]_{\text{rain}} / [\text{X}/\text{Na}^+]_{\text{sea}} \quad (\text{S4})$$

$$\text{EF}_{\text{crustal}} = [\text{X}/\text{Ca}^{2+}]_{\text{rain}} / [\text{X}/\text{Ca}^{2+}]_{\text{crustal}} \quad (\text{S5})$$

Where  $X$  is the concentration of the ion of interest,  $\text{Na}^+$  is used as the element of reference for marine source [1] and  $\text{Ca}^{2+}$  is selected as a reference element from crustal origin [7].

$$\text{SSF}(X) = (X/[\text{Na}^+])_{\text{sea}} \times [\text{Na}^+]_{\text{rain}} \quad (\text{S6})$$

$$\text{NSSF}(X) = [X]_{\text{rain}} - \text{SSF}(X) \quad (\text{S7})$$

Where  $\text{SSF}(X)$  is the marine part of the chemical element  $X$  in  $\mu\text{eq L}^{-1}$ ,  $[\text{Na}^+]_{\text{rain}}$  is the concentration of  $\text{Na}^+$  in rain ( $\mu\text{eq L}^{-1}$ ) and  $[X]/[\text{Na}]_{\text{sea}}$  is the ratio of species  $X$  to  $\text{Na}^+$  in seawater [8].  $\text{NSSF}(X)$  is the non-marine part of the chemical element  $X$  in  $\mu\text{eq L}^{-1}$  and  $[X]_{\text{rain}}$  is the specific concentration of species  $X$  in  $\mu\text{eq L}^{-1}$ .

The potential Acidity (pA) is defined as the sum of all nitrate, sulfate, formic, acetic, propionic and oxalic VWM concentrations, supposing that all these ions are associated with  $\text{H}^+$  [9]

$$\text{pA} = \sum \text{anions} = [\text{SO}_4^{2-}] + [\text{NO}_3^-] + [\text{HCOO}^-] + [\text{CH}_3\text{COO}^-] + [\text{C}_2\text{H}_5\text{COO}^-] + [\text{C}_2\text{O}_4^{2-}] \quad (\text{S8})$$

The Neutralization Factor (NF) [10,11] is:

$$\text{NF}_{x_i} = \frac{[x_i]}{([\text{NO}_3^-] + [\text{SO}_4^{2-}] + [\text{HCOO}^-] + [\text{CH}_3\text{COO}^-] + [\text{C}_2\text{H}_5\text{COO}^-] + [\text{C}_2\text{O}_4^{2-}])} \quad (\text{S9})$$

Where  $x_i$  are cations of interest, and all ionic concentrations are expressed in  $\mu\text{eq L}^{-1}$ .

Fractional Acidity (FA) represents the ratio to examine acidity neutralization capacity of rainwater [12–14] is :

$$\text{FA} = \frac{[\text{H}^+]}{([\text{NO}_3^-] + [\text{SO}_4^{2-}] + [\text{HCOO}^-] + [\text{CH}_3\text{COO}^-] + [\text{C}_2\text{H}_5\text{COO}^-] + [\text{C}_2\text{O}_4^{2-}])} \quad (\text{S10})$$

We adapted equations 8, 9, 10 by modifying the original equations of the cited authors in order to account for both mineral and organic acidic compounds.

## References

1. Kulshrestha, U.C.; Kulshrestha, M.J.; Sekar, R.; Sastry, G.S.R.; Vairamani, M. Chemical Characteristics of Rainwater at an Urban Site of South-Central India. *Atmos. Environ.* **2003**, *37*, 3019–3026. [https://doi.org/10.1016/S1352-2310\(03\)00266-8](https://doi.org/10.1016/S1352-2310(03)00266-8).
2. Laouali, D.; Galy-Lacaux, C.; Diop, B.; Delon, C.; Orange, D.; Lacaux, J.P.; Akpo, A.; Lavenue, F.; Gardrat, E.; Castera, P. Long Term Monitoring of the Chemical Composition of Precipitation and Wet Deposition Fluxes over Three Sahelian Savannas. *Atmos. Environ.* **2012**, *50*, 314–327. <https://doi.org/10.1016/j.atmosenv.2011.12.004>.
3. Conradie, E.H.; Van Zyl, P.G.; Pienaar, J.J.; Beukes, J.P.; Galy-Lacaux, C.; Venter, A.D.; Mkhathshwa, G.V. The Chemical Composition and Fluxes of Atmospheric Wet Deposition at Four Sites in South Africa. *Atmos. Environ.* **2016**, *146*, 113–131. <https://doi.org/10.1016/j.atmosenv.2016.07.033>.
4. Laouali, D.; Delon, C.; Adon, M.; Ndiaye, O.; Saneh, I.; Gardrat, E.; Dias-Alves, M.; Tagesson, T.; Fensholt, R.; Galy-Lacaux, C. Source Contributions in Precipitation Chemistry and Analysis of Atmospheric Nitrogen Deposition in a Sahelian Dry Savanna Site in West Africa. *Atmos. Res.* **2021**, *251*, 105423. <https://doi.org/10.1016/j.atmosres.2020.105423>.
5. Chao, C.Y.; Wong, K.K. Residential indoor PM10 and PM2.5 in Hong Kong and the elemental composition. *Atmospheric Environ.* **2002**, *36*, 265–277. [https://doi.org/10.1016/s1352-2310\(01\)00411-3](https://doi.org/10.1016/s1352-2310(01)00411-3).
6. Keene, W.C.; Galloway, J.N. Considerations regarding sources for formic and acetic acids in the troposphere. *J. Geophys. Res. Atmos.* **1986**, *91*, 14466. <https://doi.org/10.1029/jd091id13p14466>.
7. Safai, P.; Rao, P.; Momin, G.; Ali, K.; Chate, D.; Praveen, P. Chemical composition of precipitation during 1984–2002 at Pune, India. *Atmospheric Environ.* **2004**, *38*, 1705–1714. <https://doi.org/10.1016/j.atmosenv.2003.12.016>.
8. Keene, W.C.; Pszenny, A.A.P.; Galloway, J.N.; Hawley, M.E. Sea-Salt Corrections and Interpretation of Constituent Ratios in Marine Precipitation. *J. Geophys. Res.* **1986**, *91*, 6647. <https://doi.org/10.1029/JD091iD06p06647>.
9. Yoboué, V.; Galy-Lacaux, C.; Lacaux, J.P.; Silué, S. Rainwater Chemistry and Wet Deposition over the Wet Savanna Ecosystem of Lamto (Côte d'Ivoire). *J. Atmos. Chem.* **2005**, *52*, 117–141. <https://doi.org/10.1007/s10874-005-0281-z>.
10. Celle-Jeanton, H.; Travi, Y.; Loÿe-Pilot, M.-D.; Huneau, F.; Bertrand, G. Rainwater chemistry at a Mediterranean inland station (Avignon, France): Local contribution versus long-range supply. *Atmospheric Res.* **2009**, *91*, 118–126. <https://doi.org/10.1016/j.atmosres.2008.06.003>.
11. Rastogi, N.; Sarin, M. Chemical characteristics of individual rain events from a semi-arid region in India: Three-year study. *Atmospheric Environ.* **2005**, *39*, 3313–3323. <https://doi.org/10.1016/j.atmosenv.2005.01.053>.
12. Balasubramanian, R.; Victor, T.; Chun, N. Chemical and Statistical Analysis of Precipitation in Singapore. *Water. Air. Soil Pollut.* **2001**, *130*, 451–456. <https://doi.org/10.1023/A:1013801805621>.
13. Cao, Y.-Z.; Wang, S.; Zhang, G.; Luo, J.; Lu, S. Chemical Characteristics of Wet Precipitation at an Urban Site of Guangzhou, South China. *Atmos. Res.* **2009**, *94*, 462–469. <https://doi.org/10.1016/j.atmosres.2009.07.004>.
14. Lu, X.; Li, L.Y.; Li, N.; Yang, G.; Luo, D.; Chen, J. Chemical characteristics of spring rainwater of Xi'an city, NW China. *Atmospheric Environ.* **2011**, *45*, 5058–5063. <https://doi.org/10.1016/j.atmosenv.2011.06.026>.
